# Supplementary material for: Implementation of second-tier tests in newborn screening for the detection of vitamin B12 related acquired and genetic disorders: results on 258,637 newborns
Source: PubMed Central journal article supplement (PMC8086297; doi:10.1186/s13023-021-01784-7), 2021-04-30
Supplement: 13023_2021_1784_MOESM4_ESM.pdf [file 13023_2021_1784_MOESM4_ESM.pdf]

**Additional file 4.** Mass spectrometer parameters for the detection of methylmalonic acid, homocysteine, and methylcitric acid.

| Analyte             | Cone voltage (V) | Collision energy (eV) | MRM transition | Retention time (min) |
|---------------------|------------------|-----------------------|----------------|----------------------|
| MMA                 | 15               | 10                    | 117>73         | 0.89                 |
| MMA-d <sub>3</sub>  | 15               | 10                    | 120>76         | 0.89                 |
| Hcys                | 60               | 15                    | 136>90         | 0.57                 |
| Hcys-d <sub>8</sub> | 60               | 15                    | 140>94         | 0.57                 |
| MCA                 | 30               | 13                    | 205>125        | 0.95                 |
| MCA-d <sub>3</sub>  | 30               | 13                    | 208>128        | 0.95                 |

Hcys: homocysteine; Hcys-d<sub>8</sub>: homocysteine (3,3,3',3',4,4,4',4'-d<sub>8</sub>); MCA: methylcitric acid; MCA-d<sub>3</sub>: MCA-d<sub>3</sub>: 2-methyl-d<sub>3</sub>-citric acid; MMA: methylmalonic acid; MMA-d<sub>3</sub>: isotopically labeled methylmalonic acid; MRM: multiple reaction monitoring.
