# Supplementary material for: Implementation of second-tier tests in newborn screening for the detection of vitamin B12 related acquired and genetic disorders: results on 258,637 newborns
Source: Springer Nature journal article supplement (doi:10.1186/s13023-021-01784-7), 2021-04-30
Supplement: MOESM2 [file 19122406]

**Additional file 2.** Validation results of methylmalonic acid (MMA), methylcitric acid (MCA) and homocysteine (Hcys) on dried blood spots by UPLC-MS/MS.

|                                                                                               | MMA                              |                           |                        | Hcys                              |                           |                        | MCA                              |                           |                        |
|-----------------------------------------------------------------------------------------------|----------------------------------|---------------------------|------------------------|-----------------------------------|---------------------------|------------------------|----------------------------------|---------------------------|------------------------|
| <b>Calibration curve, n=5</b>                                                                 |                                  |                           |                        |                                   |                           |                        |                                  |                           |                        |
| Mean slope (range; SD).<br>Mean coefficient of linear regression, r <sup>2</sup> (range; SD). | 0.0112<br>(0.0105-0.0126;0.0008) |                           |                        | 0.0307<br>(0.0283-0.0324; 0.0018) |                           |                        | 0.0261<br>(0.0193-0.0291;0.0040) |                           |                        |
|                                                                                               | 0.9962<br>(0.989-0.9989;0.0040)  |                           |                        | 0.9907<br>(0.9842-0.9947;0.0039)  |                           |                        | 0.9965<br>(0.9933-0.9992;0.0025) |                           |                        |
| <b>Within-day, n=10</b>                                                                       |                                  |                           |                        |                                   |                           |                        |                                  |                           |                        |
|                                                                                               | <b>Conc. analyzed (μmol/L)</b>   | <b>Imprecision (% CV)</b> | <b>Accuracy (% RE)</b> | <b>Conc. analyzed (μmol/L)</b>    | <b>Imprecision (% CV)</b> | <b>Accuracy (% RE)</b> | <b>Conc. analyzed (μmol/L)</b>   | <b>Imprecision (% CV)</b> | <b>Accuracy (% RE)</b> |
|                                                                                               | 3                                | 7.9                       | -10.7                  | 6                                 | 19.1                      | 18.3                   | 3                                | 11.9                      | 12.9                   |
|                                                                                               | 15                               | 6.3                       | -11.8                  | 30                                | 11.9                      | -7.3                   | 15                               | 6.3                       | -5.0                   |
|                                                                                               | 40                               | 5.9                       | -4.8                   | 80                                | 13.2                      | 5.6                    | 40                               | 8.7                       | 6.6                    |
| <b>Between-day, n=10</b>                                                                      |                                  |                           |                        |                                   |                           |                        |                                  |                           |                        |
|                                                                                               | <b>Conc. analyzed (μmol/L)</b>   | <b>Imprecision (% CV)</b> | <b>Accuracy (% RE)</b> | <b>Conc. analyzed (μmol/L)</b>    | <b>Imprecision (% CV)</b> | <b>Accuracy (% RE)</b> | <b>Conc. analyzed (μmol/L)</b>   | <b>Imprecision (% CV)</b> | <b>Accuracy (% RE)</b> |
|                                                                                               | 3                                | 13.9                      | -4.22                  | 6                                 | 20.8                      | -17.56                 | 3                                | 18.1                      | 3.70                   |
|                                                                                               | 15                               | 9.9                       | -6.42                  | 30                                | 14.9                      | -10.37                 | 15                               | 11.5                      | -1.05                  |
|                                                                                               | 40                               | 10.2                      | 0.96                   | 80                                | 14.9                      | -6.60                  | 40                               | 11.1                      | 6.78                   |
| <b>Recovery (%), n=3</b>                                                                      | <b>Conc. analyzed (μmol/L)</b>   |                           |                        | <b>Conc. analyzed (μmol/L)</b>    |                           |                        | <b>Conc. analyzed (μmol/L)</b>   |                           |                        |
|                                                                                               | 3                                | 26                        |                        | 6                                 | 74                        |                        | 3                                | 33                        |                        |
|                                                                                               | 15                               | 77                        |                        | 30                                | 94                        |                        | 15                               | 85                        |                        |
|                                                                                               | 40                               | 98                        |                        | 80                                | 118                       |                        | 40                               | 109                       |                        |
| <b>LOD (μmol/L), n=3</b>                                                                      | 1                                |                           |                        | 1                                 |                           |                        | 1                                |                           |                        |
| <b>LOQ (μmol/L), n=3</b>                                                                      | 3                                |                           |                        | 3                                 |                           |                        | 3                                |                           |                        |

Conc.: concentration; CV: coefficient of variation; Hcys: homocysteine; LOD: limit of detection; LOQ: limit of quantification; MCA: methylcitric acid; MMA: methylmalonic acid; n: number of replicates; RE: relative error; SD: standard deviation; UPLC-MS/MS: ultra performance liquid chromatography-tandem mass spectrometry.
