# Supplementary material for: Implementation of second-tier tests in newborn screening for the detection of vitamin B12 related acquired and genetic disorders: results on 258,637 newborns
Source: Springer Nature journal article supplement (doi:10.1186/s13023-021-01784-7), 2021-04-30
Supplement: MOESM3 [file 19122406]

**Additional file 3.** Diseases included in the neonatal screening program of Catalonia.

**Inherited metabolic diseases**

Phenylketonuria and Hyperphenylalaninemias

Maple syrup urine disease

Tyrosinemia type I

Citrulinemia

Homocystinuria (CBS deficiency)

Glutaric aciduria type I

Isovaleric acidemia

Methylmalonic aciduria

Methylmalonic aciduria with Homocystinuria

3-Hydroxy-3-methylglutaryl-CoA lyase deficiency

$\beta$ -Ketothiolase deficiency

Propionic acidemia

Medium chain acyl-CoA dehydrogenase deficiency

Very long chain acyl-CoA dehydrogenase deficiency

Mitochondrial trifunctional protein deficiency

Multiple acyl-CoA dehydrogenase deficiency

Primary carnitine deficiency

Carnitine palmitoyltransferase 1 deficiency

Carnitine palmitoyltransferase 2 deficiency

Carnitine-acylcarnitine translocase deficiency

**Other diseases**

Cystic Fibrosis

Congenital Hypothyroidism

Sickle cell disease

Severe combined immunodeficiency
